# Supplementary material for: Heartwood Extract of Pterocarpus marsupium Roxb. Offers Defense against Oxyradicals and Improves Glucose Uptake in HepG2 Cells
Source: MDPI journal article supplement (doi:10.3390/metabo12100947), 2022-10-05
Supplement: s1 [file s1]

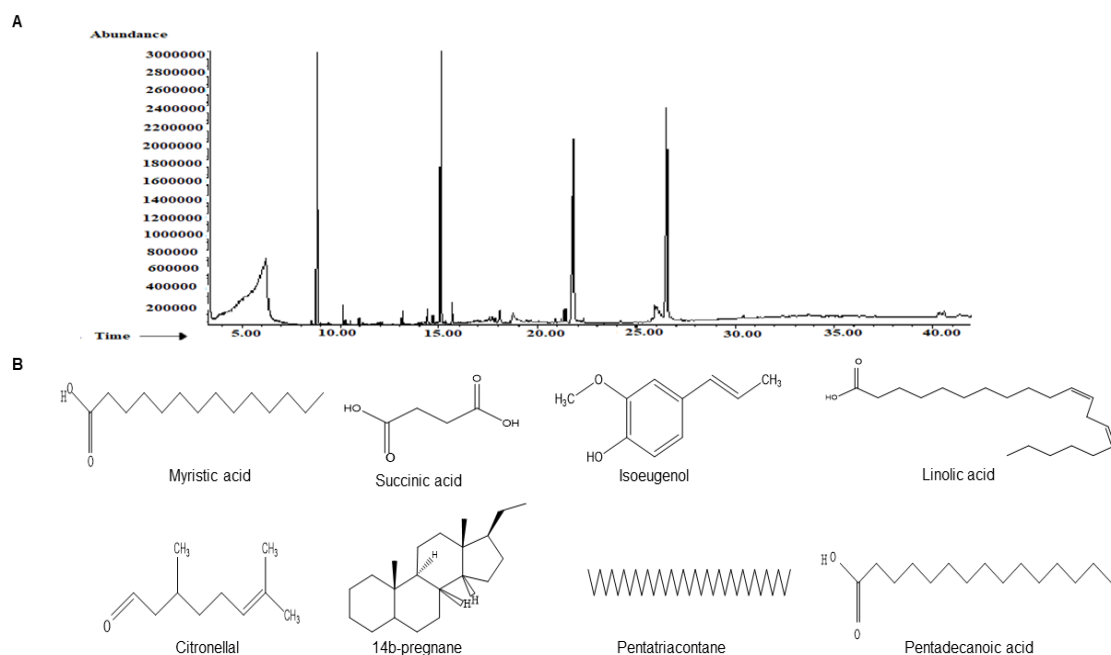

**Figure S1.** (A) GCMS chromatogram of MPME. (B) Chemical structure of 8 reported antidiabetic phytocompounds identified based on the retention time and peak area, namely Myristic acid (18.095 retention time and 0.80% peak area), Succinic acid (10.153 retention time and 0.76% peak area), (18.095 retention time and 0.80% peak area), Isoeugenol (14.691 retention time and 0.80% peak area), Pentadecanoic acid (19.658 retention time and 0.36% peak area), Oleic Acid (30.449 retention time and 0.19 % peak area), Citronellal (20.361 retention time and 0.36% peak area), *Pentatriacontane* (19.846 retention time and 0.02% peak area), 14b-pregnane (24.064 retention time and 0.02% peak area).

**Table S1.** Physiochemical parameters of MPME.

| S.no. | Parameters         | Percentage (%) |
|-------|--------------------|----------------|
| 1     | Total ash value    | 8              |
| 2     | Acid insoluble ash | 1.44           |
| 3     | Water-soluble ash  | 1.36           |
| 4     | Moisture content   | 1.25           |

**Table S2.** HPTLC fingerprint of MPME at 254 nm and 366 nm.

| S.No.                              | R <sub>f</sub> | MPME      |           |
|------------------------------------|----------------|-----------|-----------|
|                                    |                | 254 nm    | 366 nm    |
| 1.                                 | 0.04           | +         | -         |
| 2.                                 | 0.24           | +         | +         |
| 3.                                 | 0.40           | +         | +         |
| 4.                                 | 0.44           | +         | +         |
| 5.                                 | 0.47           | +         | +         |
| 6.                                 | 0.51           | +         | -         |
| 7.                                 | 0.54           | +         | +         |
| 8.                                 | 0.57           | +         | -         |
| 9.                                 | 0.66           | +         | -         |
| 10.                                | 0.77           | +         | +         |
| 11.                                | 0.87           | +         | -         |
| <b>Total number of metabolites</b> |                | <b>11</b> | <b>06</b> |

**Table S3.** Linear regression data for calibration plots of the analyzed marker using the proposed HPTLC method.

|                                    |                                                            |
|------------------------------------|------------------------------------------------------------|
| Marker                             | Quercetin                                                  |
| Solvent system                     | Toluene: ethylacetate: formic acid: methanol (6:3:0.5:0.5) |
| Wavelength                         | 254 nm                                                     |
| Retention factor (R <sub>f</sub> ) | 0.47± 0.002                                                |
| Linearity range (ng/spot)          | 200-4000                                                   |
| Regression equation                | Y=1.066x + 458.5                                           |
| Regression coefficient ± SD        | 0.993±0.011                                                |
| Slope                              | 1.066                                                      |
| LOD (ng/spot)                      | 13.65                                                      |
| LOQ (ng/spot)                      | 41.39                                                      |
| <b>Precision (% RSD)</b>           |                                                            |
| Intra-day                          | 0.44-0.79                                                  |
| Inter-day                          | 1.44-1.66                                                  |

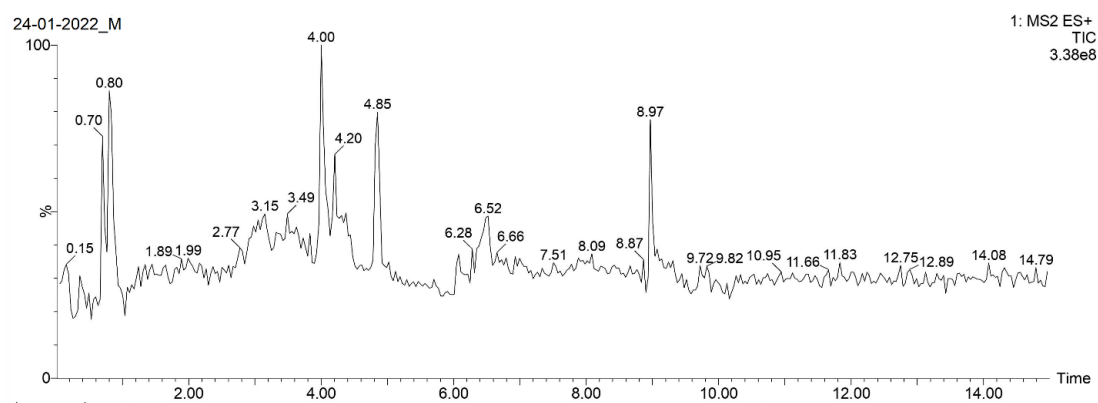

**Figure S2.** Ultra-performance liquid chromatography-mass spectroscopy (UPLC-MS) chromatogram.
